# Supplementary material for: Exploiting metabolic acidosis in solid cancers using a tumor-agnostic pH-activatable nanoprobe for fluorescence-guided surgery
Source: PubMed Central journal article supplement (PMC7320194; doi:10.1038/s41467-020-16814-4), 2020-06-26
Supplement: 41467_2020_16814_MOESM1_ESM.pdf [file 41467_2020_16814_MOESM1_ESM.pdf]

## **Supplementary data**

**Exploiting metabolic acidosis in solid cancers using a tumor-agnostic pH-  
activatable nanoprobe for fluorescence-guided surgery**

Voskuil et al.

## Supplementary Figures

### Dose dependent increase of exposure of ONM-100

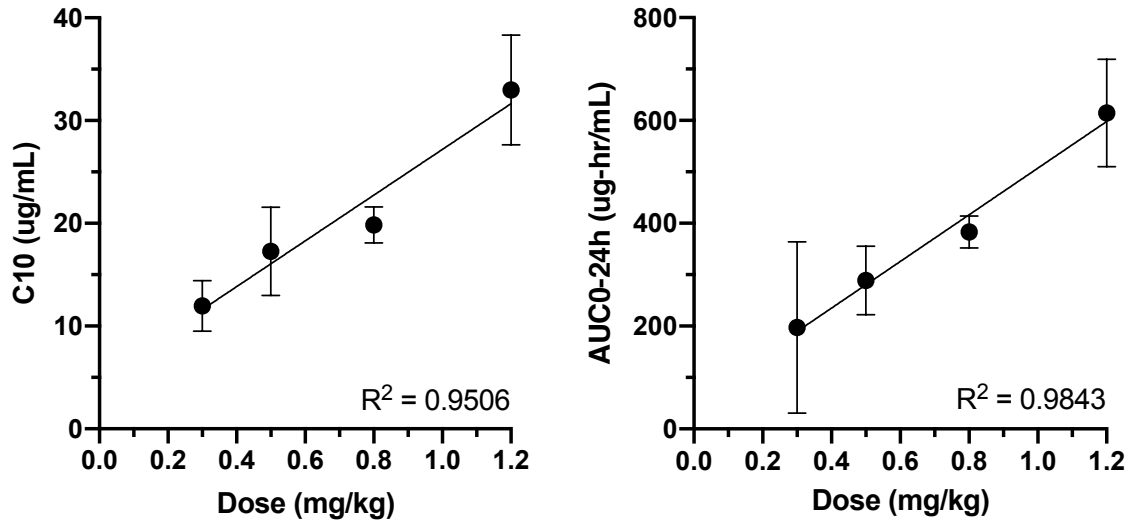

### Supplementary Figure 1 | Dose dependent pharmacokinetics

There is a dose-dependent correlation between the mean plasma concentration of ONM-100 ten minutes after administration and the mean area under the curve in the first 24 hours with a  $R^2$  of 0.95 and 0.98 respectively. Dots represent mean values per cohort, error bars standard deviation.  $N=3$  for 0.3, 0.5 and 0.8mg per kg cohorts,  $N=18$  for 1.2mg per kg cohort. Abbreviations: C10m: Plasma concentration at 10 minutes; AUC0-24h: Area under the curve in the first 24 hours; ug: micrograms; mL: milliliters; hr: hour. Source data are provided as a Source Data file.

### Tumor type independent pharmacokinetic profile

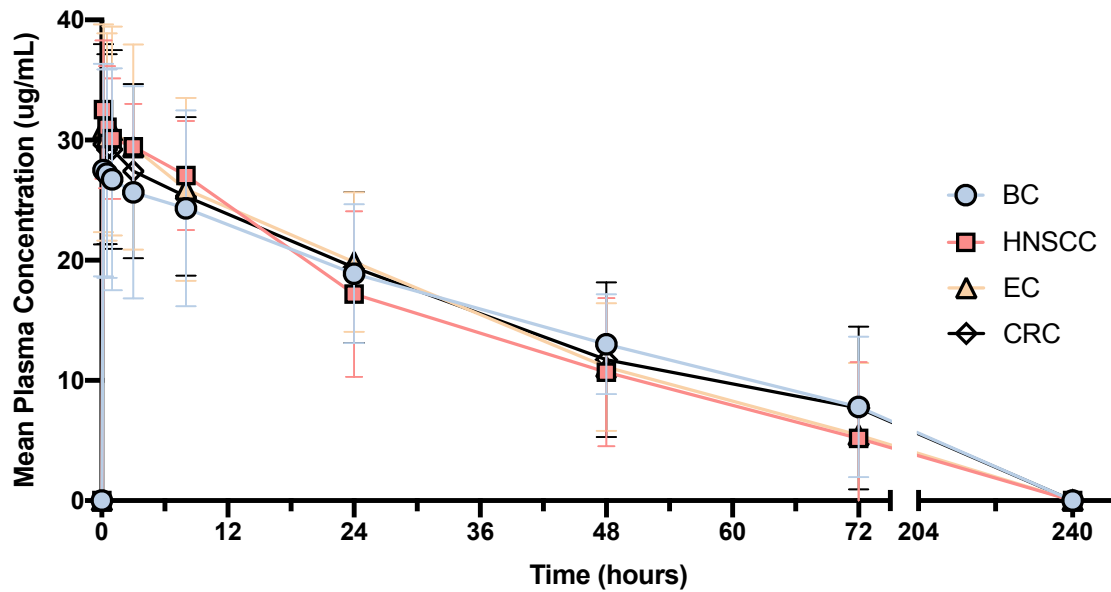

#### Supplementary Figure 2 | Pharmacokinetic comparisons of different tumor types

There were no apparent pharmacokinetic differences between the subjects who received 1.2 mg per kg, based on tumor type. The mean terminal-phase half-life in the 1.2 mg per kg cohort was 44.5 with a standard deviation of 15.8 hours. Dots represent mean values per tumor type (N=3-13, depending on number of patients), error bars standard deviation. Abbreviations: BC: Breast Cancer; HNSCC: Head and Neck Squamous Cell Cancer; EC: Esophageal Cancer; CRC: Colorectal Cancer. Source data are provided as a Source Data file

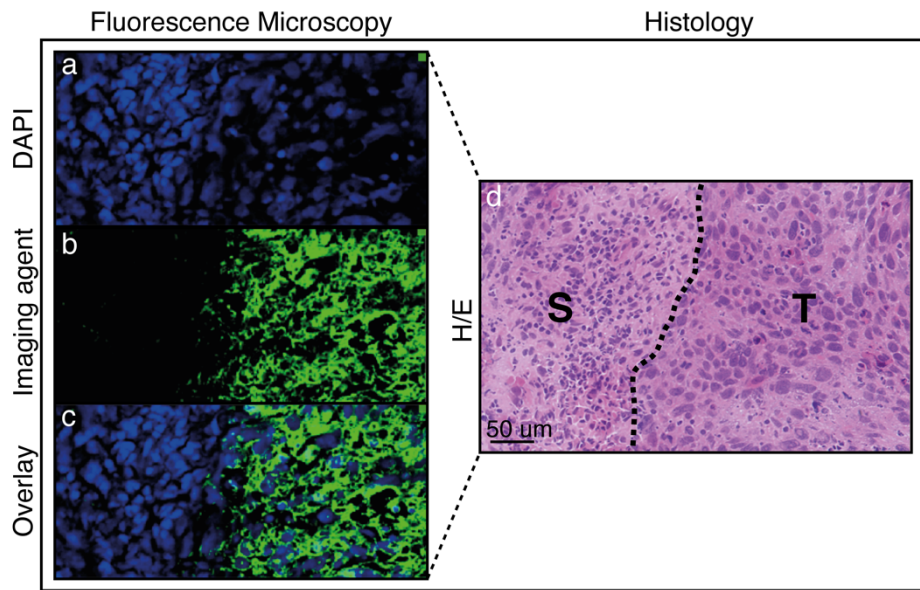

**Supplementary Figure 3 | Fluorescence microscopy to confirm tumor-specific activation of ONM-100**

Fluorescence microscopy was performed *ex vivo* after spraying ONM-100 onto tissue sections of a freshly frozen HNSCC specimen directly after excision. DAPI was applied for nuclear staining (blue) (a) and ONM-100 (green) for fluorescence visualization (b). A sharp delineation of fluorescence between the tumor and stromal tissue (c) was observed and correlated with corresponding histopathology tissue sections stained with hematoxyline and eosin (d).

Abbreviations: HNSCC: Head and Neck Squamous Cell Carcinoma; T: Tumor; S: Stroma; H/E:

Hematoxylin Eosin; DAPI: 4',6-diamidino-2-phenylindole. Experiment has been repeated three times.

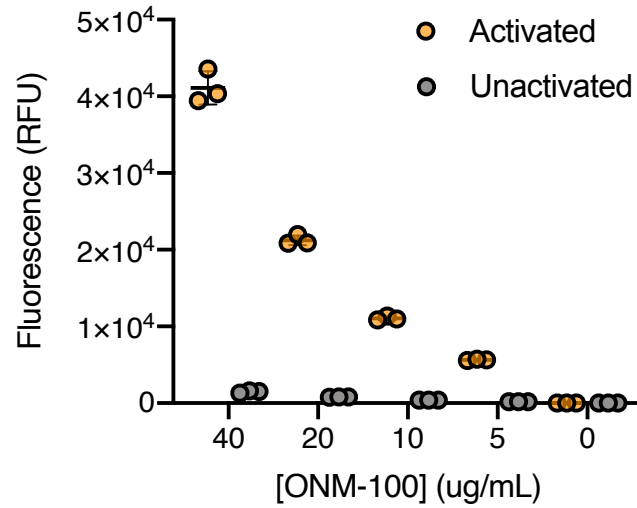

#### Supplementary Figure 4 | pH-dependent activation of ONM-100 in human plasma

Increasing amounts of ONM-100 were added to human plasma which did not show an increase in fluorescence. When the experiment was repeated after the addition of HCl to supply protons to the plasma, there was an increase in fluorescence with the addition of increasing amounts of intact ONM-100 suggesting that acidosis was activating the ONM-100 and thus the fluorescence in a dose-dependent manner. Dots represent individual data points. Error bars represent standard deviation. Abbreviations: RFU: Relative Fluorescence Units.

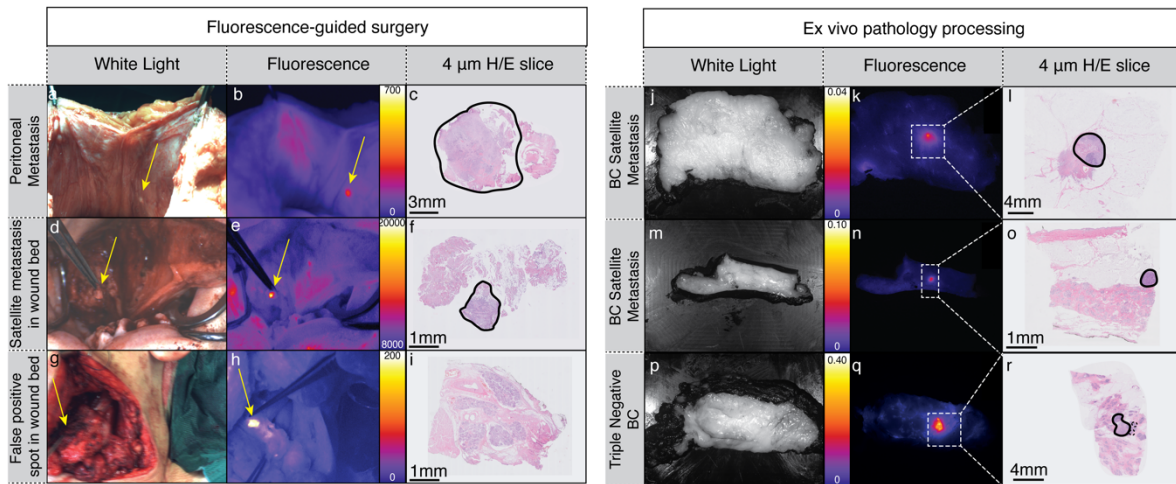

### Supplementary Figure 5 | Clinically Relevant images

Intraoperatively detected Peritoneal Metastasis (PM) (a-c). An additional tumor lesion detected in the surgical cavity after a Head and Neck Squamous Cell Carcinoma (HNSCC) resection of the mandible (d-f). A false positive fluorescent lesion from salivary gland tissue (g-i). Additional satellite metastases of the primary tumor lesion were detected in two BC subjects and confirmed by final histopathological examination (j-o). An additional primary tumor lesion was detected on a fresh tissue slice from a BC subject showing triple negative breast cancer which was not detected before and during surgery (p-r). The tumor is delineated as a solid black line in the H/E slices (c,f,l,o,r). The false positive contained no viable tumor tissue (i). Abbreviations: H/E: Hematoxylin Eosin; BC: Breast Cancer.

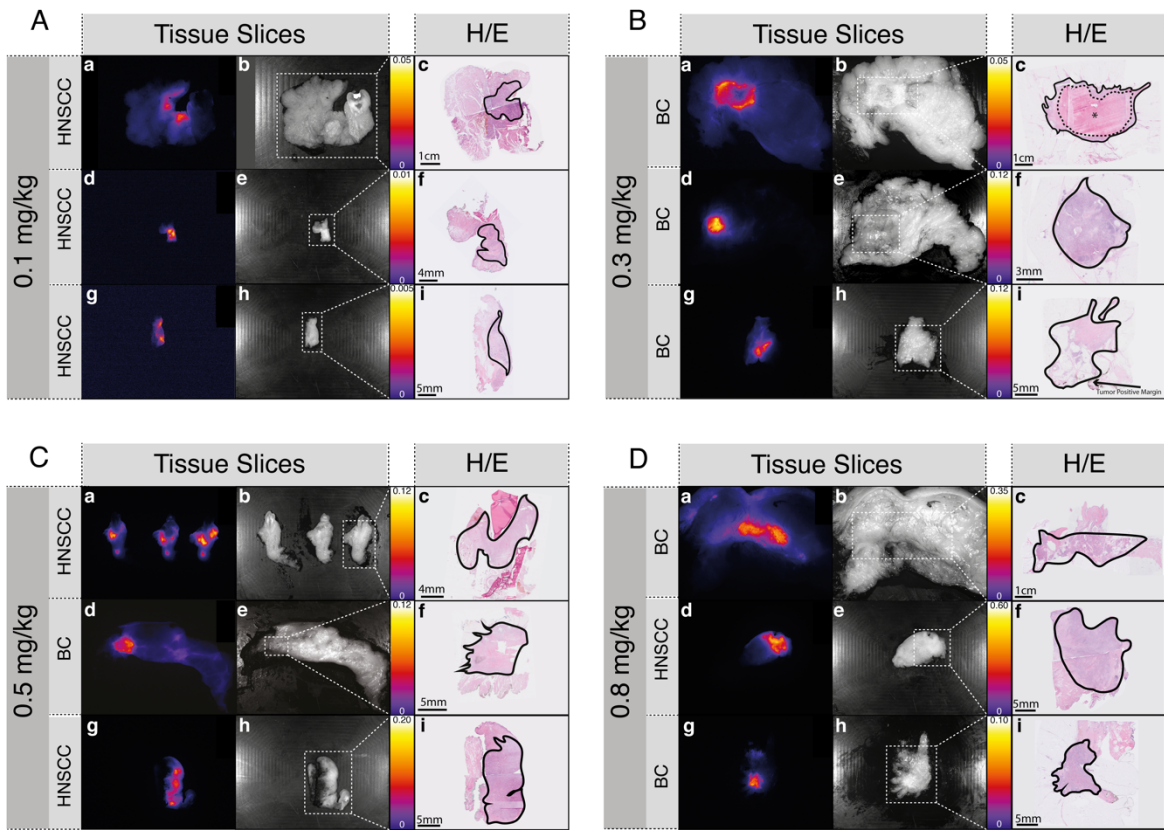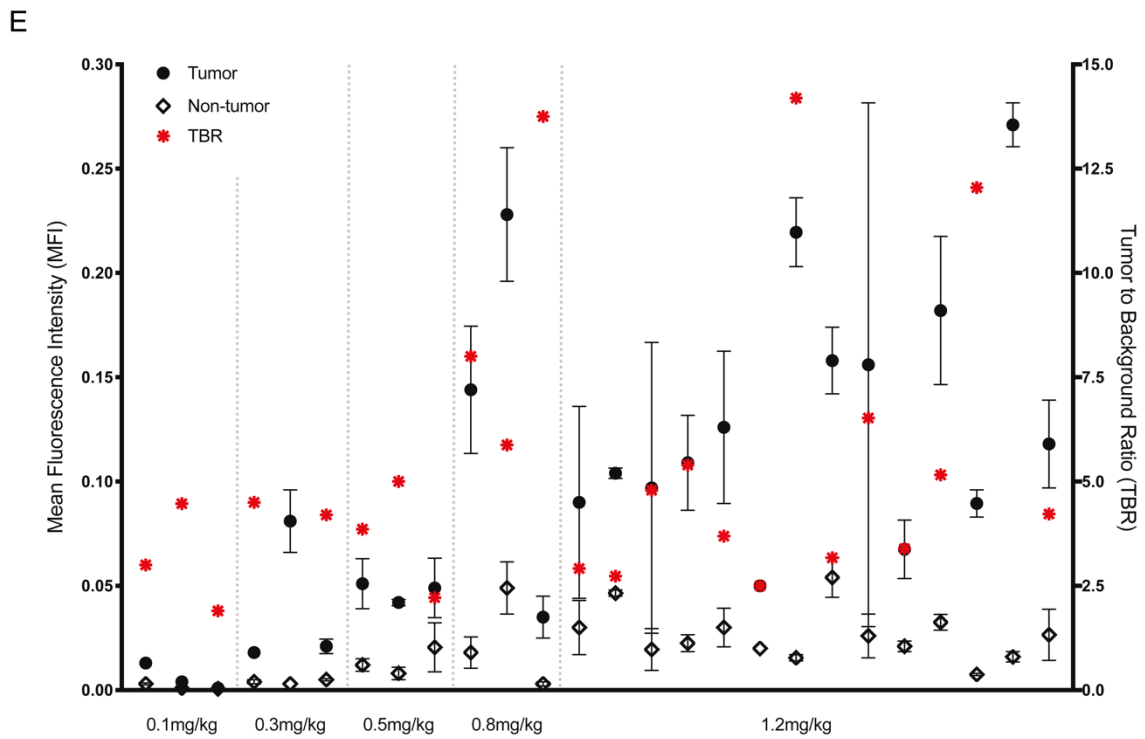

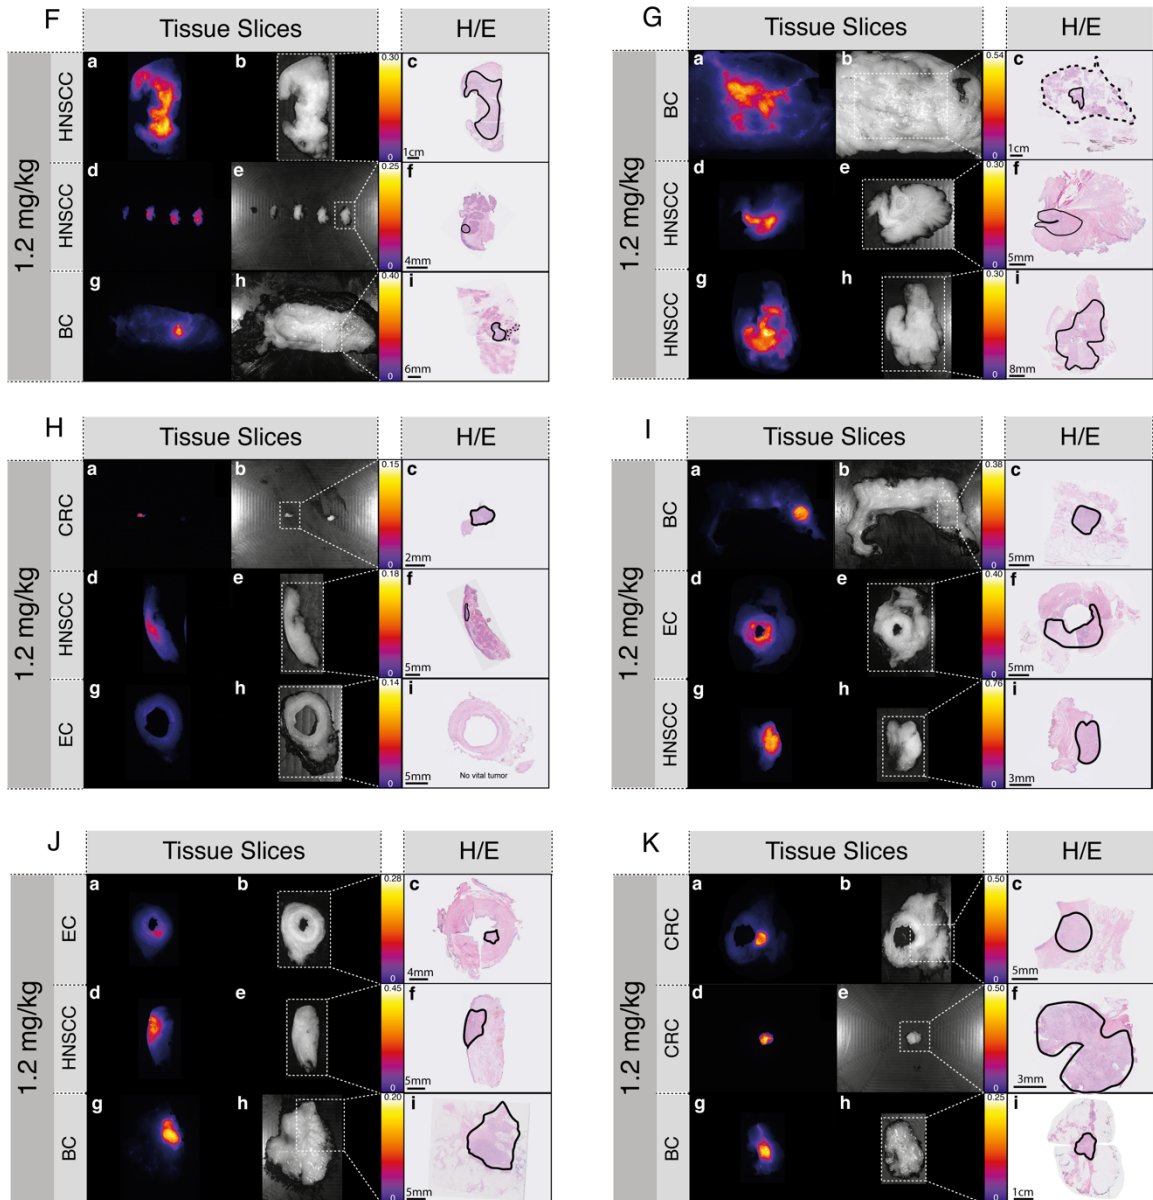

### Supplementary Figure 6 | Representative images per subject

Representative sequences of white light and fluorescent images of tissue slices with the corresponding H/E 4μm slice per subject. **A:** 0.1mg per kg dose cohort. HNSCC, subject 1 (a-c). HNSCC, subject 2 (d-f). HNSCC, subject 3 (g-i); the solid line on the H/E slice represents the tumor. **B:** 0.3mg per kg dose cohort. BC, subject 4. The viable tumor is between the solid and dashed line on the H/E slice. The dashed line represents the necrotic area on a H/E slice (a-c). BC, subject 5 (d-f). BC, subject 6. The arrow indicates a positive surgical margin (g-i). The solid



line on the H/E slice represents the tumor. **C:** 0.5mg per kg dose cohort. HNSCC, subject 7 (a-c). BC, subject 8 (d-f). HNSCC, subject 9 (g-i). The solid line on the H/E slice represents the tumor. **D:** 0.8mg per kg dose cohort. BC, subject 10 (a-c). HNSCC, subject 11 (d-f). BC, subject 12 (g-i). The solid line on the H/E slice represents the tumor. **E:** The MFI on all the subjects' tumor tissue slices was higher compared to non-tumor tissue. Dots and asterisks represent median values ( $N \geq 3-8$ , depending on availability of tissue slides), error bars represent interquartile ranges. **F:** 1.2mg per kg dose cohort. HNSCC, subject 13 (a-c). HNSCC, subject 14 (d-f). BC, subject 15 (g-i). The solid line on the H/E slice represents a tumor. **G:** 1.2mg per kg dose cohort. BC, subject 16 (a-c). HNSCC, subject 17 (d-f). HNSCC, subject 18 (g-l). The solid line on the H/E slice represents a tumor. The dashed line on the H/E slice represents a Ductal Carcinoma in Situ. **H:** 1.2mg per kg dose cohort. CRC subject 19 (a-c). HNSCC, subject 20 (d-f). No vital tumor present after neo-adjuvant treatment of EC therefore complete response, subject 21 (g-i). The solid line on the H/E slice represents a tumor. **I:** 1.2mg per kg dose cohort. BC, subject 22 (a-c). EC, subject 23 (d-f). HNSCC, subject 24 (g-l). The solid line on the H/E slice represents a tumor. **J:** 1.2mg per kg dose cohort. EC, subject 25 (a-c). HNSCC, subject 26 (d-f). BC, subject 27 (g-i). The solid line on the H/E slice represents a tumor. **K:** 1.2mg per kg dose cohort. CRC subject 28 (a-c). CRC, subject 29 (d-f). BC, subject 30 (g-i). The solid line on the H/E slice represents a tumor. Abbreviations: H/E: Hematoxylin Eosin, HNSCC: Head and Neck Squamous Cell Carcinoma, BC: Breast Cancer, EC: Esophageal Cancer, CRC: Colorectal Cancer. TBR: Tumor to Background Ratio. MFI: Mean Fluorescence Intensity, IQR: Interquartile range.

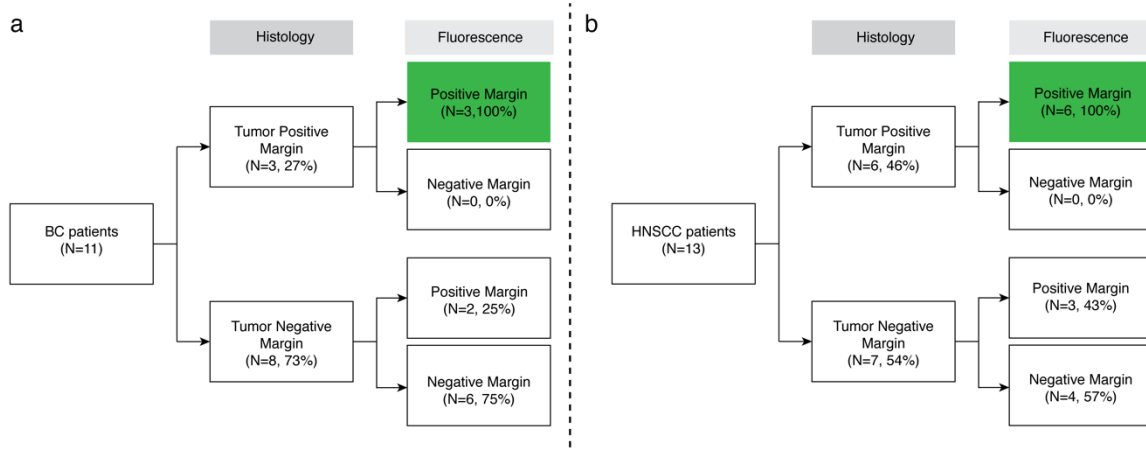

### Supplementary Figure 7 | Correlating fluorescence surgical margin assessment with final histopathology results

Intraoperative assessment of the surgical margin during fluorescence-guided surgery can be done either by intraoperative fluorescence imaging of the surgical cavity or fluorescence imaging of the excised specimen at the *'Back-Table'*. The final histopathology is correlated with the fluorescence images of breast cancer subjects (a) and head and neck squamous cell carcinoma subjects (b). Abbreviations: BC: Breast Cancer, HNSCC: Head and Neck Squamous Cell Carcinoma.

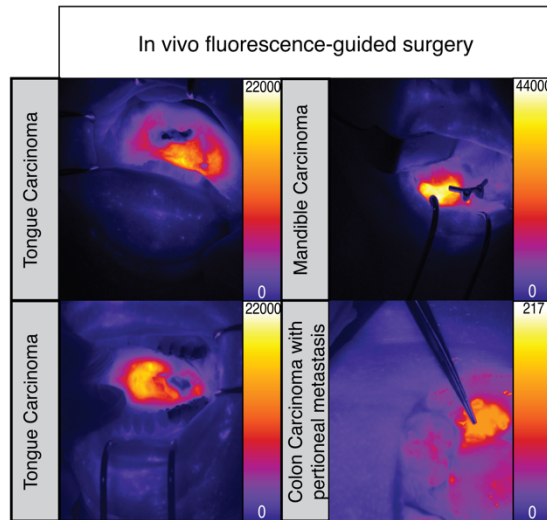

### Supplementary Figure 8 | In vivo imaging using ONM-100 fluorescence

Representative examples of in vivo imaging data using ONM-100 fluorescence. A large tongue carcinoma with a central necrotic ulcer was in vivo visualized using ONM-100 (a). A cancer located at the right mandible / floor of mouth was in vivo visualized using ONM-100 (b). A large tongue carcinoma with a central necrotic ulcer was in vivo visualized using ONM-100 (c). A colorectal carcinoma with extensive peritoneal metastases was in vivo visualized using ONM-100 (d).

## Supplementary Tables

| Patient ID | Dose (mg per kg) | Weight (kg) | Absolute tracer dose (mg) | Tumor Type | Stage (TNM)                 | Max. tumor size     |
|------------|------------------|-------------|---------------------------|------------|-----------------------------|---------------------|
| ON1101     | 0.3              | 83.5        | 25.05                     | BC         | pT2N3aM1                    | 3.0cm               |
| ON1102     | 0.3              | 113         | 33.9                      | BC         | pT1cN0                      | 1.1cm               |
| ON1103     | 0.3              | 71          | 21.3                      | BC         | pT2N0                       | 2.5cm               |
| ON1104     | 0.5              | 92          | 46                        | HNSCC      | pT4N1m0                     | 3.0cm               |
| ON1105     | 0.5              | 52          | 26                        | BC         | pT2N0                       | 2.8cm               |
| ON1106     | 0.5              | 119.2       | 59.6                      | HNSCC      | pT3N2bM0                    | 5.0cm               |
| ON1107     | 0.8              | 93.7        | 74.96                     | BC         | PT3N3a                      | 6.5cm               |
| ON1108     | 0.8              | 93          | 74.4                      | HNSCC      | pT3N0Mx                     | 3.2cm               |
| ON1109     | 0.8              | 73          | 58.4                      | BC         | pT1cN0                      | 1.1cm               |
| ON1110     | 0.1              | 64          | 6.4                       | HNSCC      | pT3N0mx                     | 2.3cm               |
| ON1111     | 0.1              | 53          | 5.3                       | HNSCC      | pT1N0Mx                     | 2.0cm               |
| ON1112     | 0.1              | 69          | 6.9                       | HNSCC      | pT2N0                       | 1.4cm               |
| ON1113     | 1.2              | 65          | 78                        | HNSCC      | pT3N2bMx                    | 4.0cm               |
| ON1114     | 1.2              | 64          | 76.8                      | HNSCC      | PT1N1Mx                     | 2mm                 |
| ON1115     | 1.2              | 64          | 76.8                      | BC         | pT1bN0Mx (2 primary tumors) | 0.6cm               |
| ON1116     | 1.2              | 72          | 86.4                      | BC         | pT1cN0                      | 1.1cm               |
| ON1118     | 1.2              | 72          | 86.4                      | HNSCC      | pT2N0                       | 2.4cm               |
| ON1119     | 1.2              | 89          | 106.8                     | HNSCC      | pT4N0                       | 3.8cm               |
| ON1120     | 1.2              | 94          | 112.8                     | PC         | n/a                         | n/a                 |
| ON1121     | 1.2              | 79          | 94.8                      | HNSCC      | pT1N0                       | 5mm                 |
| ON1122     | 1.2              | 78          | 93.6                      | EC         | ypT0N0                      | n/a                 |
| ON1123     | 1.2              | 60          | 72                        | BC         | pT1cN0                      | 1.2cm               |
| ON1124     | 1.2              | 96          | 115.2                     | EC         | ypT3N1                      | 5cm                 |
| ON1125     | 1.2              | 85          | 102                       | HNSCC      | pT1N0                       | 1.7cm               |
| ON1126     | 1.2              | 96          | 115.2                     | EC         | ypT2N2                      | 5cm                 |
| ON1127     | 1.2              | 46.5        | 55.8                      | HNSCC      | pT2N0                       | 1.5cm               |
| ON1128     | 1.2              | 87          | 104.4                     | BC + OC    | pT3N0M0 + OC: no tumor      | 1.5 cm              |
| ON1129     | 1.2              | 110         | 132                       | CRC + RC   | ypT2N0 + pT3aN0             | CRC: 1.5cm RC: 12cm |
| ON1130     | 1.2              | 83          | 99.6                      | CRC        | pT4N1M1                     | Not applicable      |
| ON1151     | 1.2              | 81          | 97.2                      | BC         | pT1b                        | 1cm                 |

### **Supplementary Table 1 | Patient characteristics**

Patient characteristics. Abbreviations: TNM; Tumor Nodal Metastasis tumor classification. BC: Breast cancer, HNSCC: Head and Neck squamous cell carcinoma; PC: Peritoneal metastasis; EC: Esophageal cancer; OC: Ovarian Cancer; RC: Rectal Cancer.

| Patient | Tumor type | Margin status            | Cavity fluo-<br>rescence | Biopsy<br>performed | Specimen<br>margin<br>fluorescence | Correlation |
|---------|------------|--------------------------|--------------------------|---------------------|------------------------------------|-------------|
| 1       | BC         | Tumor-negative           | no                       |                     | no                                 | TN          |
| 2       | BC         | Tumor-negative           | no                       |                     | no                                 | TN          |
| 3       | BC         | Tumor-positive           | no                       |                     | yes                                | TP          |
| 4       | HNSCC      | Tumor-negative           | no                       |                     | no                                 | TN          |
| 5       | BC         | Tumor-negative           | no                       |                     | no                                 | TN          |
| 6       | HNSCC      | Tumor-positive           | yes                      | yes                 | yes                                | TP          |
| 7       | BC         | Tumor-negative           | no                       |                     | no                                 | TN          |
| 8       | HNSCC      | Tumor-negative           | yes                      | yes                 | yes                                | FP          |
| 9       | BC         | Tumor-positive           | yes                      |                     | yes                                | TP          |
| 10      | HNSCC      | Tumor-positive           | no                       |                     | yes                                | TP          |
| 11      | HNSCC      | Tumor-positive           | n/a                      |                     | yes                                | TP          |
| 12      | HNSCC      | Tumor-negative           | no                       |                     | no                                 | TN          |
| 13      | HNSCC      | Tumor-positive           | yes                      | yes                 | yes                                | TP          |
| 14      | HNSCC      | Tumor-negative           | no                       |                     | yes                                | FP          |
| 15      | BC         | Tumor-negative           | no                       |                     | no                                 | TN          |
| 16      | BC         | Tumor-negative           | no                       |                     | no                                 | TN          |
| 17      | HNSCC      | Tumor-positive           | no                       |                     | yes                                | TP          |
| 18      | HNSCC      | Tumor-positive           | yes                      | n/a                 | yes                                | TP          |
| 19      | CRC        | n/a                      | n/a                      |                     | n/a                                | n/a         |
| 20      | HNSCC      | Tumor-negative           | no                       |                     | yes                                | FP          |
| 21      | EC         | n/a                      | n/a                      |                     | n/a                                | n/a         |
| 22      | BC         | Tumor-negative           | yes                      | yes                 | yes                                | FP          |
| 23      | EC         | Tumor-negative           | no                       |                     | no                                 | TN          |
| 24      | HNSCC      | Tumor-negative           | no                       |                     | no                                 | TN          |
| 25      | EC         | Tumor-negative           | no                       |                     | no                                 | TN          |
| 26      | HNSCC      | Tumor-negative           | no                       |                     | no                                 | TN          |
| 27      | BC         | Tumor-positive           | no                       |                     | yes                                | TP          |
| 28      | CRC        | Tumor-negative           | no                       |                     | no                                 | TN          |
| 29      | CRC        | n/a                      | n/a                      |                     | n/a                                | n/a         |
| 30      | BC         | Tumor-negative<br>(DCIS) | yes                      | n/a                 | yes                                | FP?         |

### Supplementary Table 2 | Correlating fluorescence with histopathology per patient

Intraoperative assessment of the surgical margin during fluorescence-guided surgery, can be either done by intraoperative fluorescence imaging of the surgical cavity or fluorescence imaging of the excised specimen at the 'Back-Table' which is then correlated with the histopathology results on a per patient basis. The surgical resection margins are displayed

according to the US Guidelines per tumor type. Regarding patient 11, no fluorescence imaging of the surgical cavity was performed due to logistics. Regarding patient 18, no biopsy was performed due to the severity of the remaining fluorescence. Regarding patient 30, no biopsy was performed due to logistics. Regarding patients 19, 29 and 21, no tumor containing specimens were excised since peritoneal metastases or a complete response after neoadjuvant treatment was observed respectively.

Abbreviations: BC: Breast cancer; HNSCC: Head and neck squamous cell cancer; EC: Esophageal cancer; CRC: Colorectal cancer; DCIS; Ductal Carcinoma in Situ; TN: True negative; TP: True positive; FP: False positive.
